# Supplementary material for: Phosphine/thiolate-containing dinitrosyl cobalt complexes (DNCCs): synthesis, characterization, interconversion, X-ray diffraction identification and NO release
Source: Royal Society of Chemistry journal article supplement (doi:10.1039/d3dt01681a), 2023-01-01
Supplement: d3dt01681a1.pdf [file d3dt01681a1.pdf]

## Supporting Information

# Phosphine/Thiolate Containing Dinitrosyl Cobalt Complexes (DNCCs): Synthesis, Characterization, Interconversion, X-ray Diffraction Identification and Its NO Releasing

Wen-Chieh Chang,<sup>a</sup> Wan-Tin Du,<sup>a</sup> Yi-Xuan Lin,<sup>a</sup> Ruei-Lin Jhang<sup>a</sup> and  
Chung-Hung Hsieh<sup>a\*</sup>

a. Department of Chemistry, Tamkang University, Tamsui, New Taipei City 25137  
Taiwan

[\\*chsieh@mail.tku.edu.tw](mailto:chsieh@mail.tku.edu.tw)

| SI Table of Contents                                                                                                                           | Page # |
|------------------------------------------------------------------------------------------------------------------------------------------------|--------|
| 1. Full X-ray Structure Data and Tables for Complex <b>1</b>                                                                                   | S2     |
| 2. Full X-ray Structure Data and Tables for Complex <b>2</b>                                                                                   | S4     |
| 3. Full X-ray Structure Data and Tables for Complex <b>3</b>                                                                                   | S7     |
| 4. Full X-ray Structure Data and Tables for Complex <b>4</b>                                                                                   | S10    |
| 5. Full X-ray Structure Data and Tables for Complex <b>5</b>                                                                                   | S13    |
| 6. Full X-ray Structure Data and Tables for Complex<br>[(dppe)Co(NO) <sub>2</sub> ][BF <sub>4</sub> ] (dppe = 1,2-Bis(diphenylphosphino)ethan) | S20    |
| 7. The Molecular Structure of<br>[(dppe)Co(NO) <sub>2</sub> ][BF <sub>4</sub> ] (dppe = 1,2-Bis(diphenylphosphino)ethan)                       | S22    |
| 8. Overlay of CV of complexes <b>4</b> and complex <b>5</b>                                                                                    | S22    |
| 9. The <sup>31</sup> P and <sup>1</sup> H NMR spectra for complex <b>1-4</b>                                                                   | S23    |
| 10. The UV spectra of complex <b>1-4</b>                                                                                                       | S27    |
| 11. NO trapping experiments of complex <b>1-5</b> and IR spectra                                                                               | S29    |
| 12. The <sup>1</sup> H NMR spectrum of isolated diphenyl disulfide                                                                             | S30    |

**Table S1.** Crystal data and structure refinement for (PPh<sub>3</sub>)(CO)<sub>2</sub>Co(NO) (**1**)

|                                   |                                                          |                                                             |
|-----------------------------------|----------------------------------------------------------|-------------------------------------------------------------|
| Identification code               | ic17097                                                  |                                                             |
| Empirical formula                 | C <sub>20</sub> H <sub>15</sub> Co N O <sub>3</sub> P    |                                                             |
| Formula weight                    | 407.23                                                   |                                                             |
| Temperature                       | 200(2) K                                                 |                                                             |
| Wavelength                        | 0.71073 Å                                                |                                                             |
| Crystal system                    | Triclinic                                                |                                                             |
| Space group                       | P-1                                                      |                                                             |
| Unit cell dimensions              | a = 10.1780(7) Å<br>b = 10.4315(7) Å<br>c = 10.9687(8) Å | α = 62.4838(14)°.<br>β = 78.8115(15)°.<br>γ = 64.1468(15)°. |
| Volume                            | 929.42(11) Å <sup>3</sup>                                |                                                             |
| Z                                 | 2                                                        |                                                             |
| Density (calculated)              | 1.455 Mg/m <sup>3</sup>                                  |                                                             |
| Absorption coefficient            | 1.028 mm <sup>-1</sup>                                   |                                                             |
| F(000)                            | 416                                                      |                                                             |
| Crystal size                      | 0.25 x 0.20 x 0.20 mm <sup>3</sup>                       |                                                             |
| Theta range for data collection   | 2.09 to 27.50°.                                          |                                                             |
| Index ranges                      | -13 ≤ h ≤ 13, -13 ≤ k ≤ 13, -14 ≤ l ≤ 14                 |                                                             |
| Reflections collected             | 12097                                                    |                                                             |
| Independent reflections           | 4269 [R(int) = 0.0302]                                   |                                                             |
| Completeness to theta = 27.50°    | 99.8 %                                                   |                                                             |
| Absorption correction             | Semi-empirical from equivalents                          |                                                             |
| Max. and min. transmission        | 0.8208 and 0.7832                                        |                                                             |
| Refinement method                 | Full-matrix least-squares on F <sup>2</sup>              |                                                             |
| Data / restraints / parameters    | 4269 / 0 / 235                                           |                                                             |
| Goodness-of-fit on F <sup>2</sup> | 1.033                                                    |                                                             |
| Final R indices [I > 2σ(I)]       | R1 = 0.0388, wR2 = 0.0946                                |                                                             |
| R indices (all data)              | R1 = 0.0469, wR2 = 0.0993                                |                                                             |
| Largest diff. peak and hole       | 0.330 and -0.626 e.Å <sup>-3</sup>                       |                                                             |

**Table S2.** Bond lengths [ $\text{\AA}$ ] and angles [ $^\circ$ ] for **1**

---

|             |            |                   |            |
|-------------|------------|-------------------|------------|
| Co-NC2      | 1.719(2)   | C(1)-Co-P(1)      | 105.38(7)  |
| Co-NC1      | 1.737(2)   | C(8)-P(1)-C(14)   | 103.57(9)  |
| Co-C(1)     | 1.771(2)   | C(8)-P(1)-C(2)    | 102.83(9)  |
| Co-P(1)     | 2.2181(5)  | C(14)-P(1)-C(2)   | 103.56(9)  |
| P(1)-C(8)   | 1.8216(19) | C(8)-P(1)-Co      | 116.91(6)  |
| P(1)-C(14)  | 1.8232(19) | C(14)-P(1)-Co     | 114.73(6)  |
| P(1)-C(2)   | 1.826(2)   | C(2)-P(1)-Co      | 113.59(7)  |
| C(1)-O(1)   | 1.134(3)   | O(1)-C(1)-Co      | 178.6(2)   |
| NC1-O(2)    | 1.141(3)   | O(2)-NC1-Co       | 178.67(19) |
| NC2-O(3)    | 1.143(3)   | O(3)-NC2-Co       | 177.9(3)   |
| C(2)-C(7)   | 1.386(3)   | C(7)-C(2)-C(3)    | 119.18(19) |
| C(2)-C(3)   | 1.391(3)   | C(7)-C(2)-P(1)    | 123.20(17) |
| C(3)-C(4)   | 1.382(3)   | C(3)-C(2)-P(1)    | 117.62(16) |
| C(4)-C(5)   | 1.369(4)   | C(4)-C(3)-C(2)    | 120.1(2)   |
| C(5)-C(6)   | 1.377(4)   | C(5)-C(4)-C(3)    | 120.4(2)   |
| C(6)-C(7)   | 1.387(3)   | C(4)-C(5)-C(6)    | 120.0(2)   |
| C(8)-C(9)   | 1.384(3)   | C(5)-C(6)-C(7)    | 120.2(2)   |
| C(8)-C(13)  | 1.389(3)   | C(2)-C(7)-C(6)    | 120.1(2)   |
| C(9)-C(10)  | 1.384(3)   | C(9)-C(8)-C(13)   | 118.99(18) |
| C(10)-C(11) | 1.373(3)   | C(9)-C(8)-P(1)    | 122.02(15) |
| C(11)-C(12) | 1.379(3)   | C(13)-C(8)-P(1)   | 118.98(15) |
| C(12)-C(13) | 1.381(3)   | C(8)-C(9)-C(10)   | 120.4(2)   |
| C(14)-C(15) | 1.389(3)   | C(11)-C(10)-C(9)  | 120.2(2)   |
| C(14)-C(19) | 1.397(3)   | C(10)-C(11)-C(12) | 119.9(2)   |
| C(15)-C(16) | 1.388(3)   | C(11)-C(12)-C(13) | 120.1(2)   |
| C(16)-C(17) | 1.377(3)   | C(12)-C(13)-C(8)  | 120.4(2)   |
| C(17)-C(18) | 1.382(3)   | C(15)-C(14)-C(19) | 118.97(18) |
| C(18)-C(19) | 1.377(3)   | C(15)-C(14)-P(1)  | 122.64(15) |
|             |            | C(19)-C(14)-P(1)  | 118.37(15) |
| NC2-Co-NC1  | 116.78(11) | C(16)-C(15)-C(14) | 120.2(2)   |
| NC2-Co-C(1) | 113.47(11) | C(17)-C(16)-C(15) | 120.2(2)   |
| NC1-Co-C(1) | 110.77(10) | C(16)-C(17)-C(18) | 120.0(2)   |
| NC2-Co-P(1) | 105.06(7)  | C(19)-C(18)-C(17) | 120.2(2)   |
| NC1-Co-P(1) | 104.07(7)  | C(18)-C(19)-C(14) | 120.4(2)   |

---

**Table S3.** Crystal data and structure refinement for (PPh<sub>3</sub>)<sub>2</sub>(CO)Co(NO) (2)

|                                   |                                                                    |                                          |
|-----------------------------------|--------------------------------------------------------------------|------------------------------------------|
| Identification code               | ch17594                                                            |                                          |
| Empirical formula                 | C <sub>37</sub> H <sub>30</sub> Co N O <sub>2</sub> P <sub>2</sub> |                                          |
| Formula weight                    | 641.49                                                             |                                          |
| Temperature                       | 200(2) K                                                           |                                          |
| Wavelength                        | 0.71073 Å                                                          |                                          |
| Crystal system                    | Monoclinic                                                         |                                          |
| Space group                       | P 2/c                                                              |                                          |
| Unit cell dimensions              | a = 11.6879(3) Å<br>b = 8.1606(3) Å<br>c = 17.0513(6) Å            | α = 90°.<br>β = 106.191(2)°.<br>γ = 90°. |
| Volume                            | 1561.85(9) Å <sup>3</sup>                                          |                                          |
| Z                                 | 2                                                                  |                                          |
| Density (calculated)              | 1.364 Mg/m <sup>3</sup>                                            |                                          |
| Absorption coefficient            | 0.686 mm <sup>-1</sup>                                             |                                          |
| F(000)                            | 664                                                                |                                          |
| Crystal size                      | 0.30 x 0.28 x 0.04 mm <sup>3</sup>                                 |                                          |
| Theta range for data collection   | 2.49 to 25.08°.                                                    |                                          |
| Index ranges                      | -13 ≤ h ≤ 13, -8 ≤ k ≤ 9, -20 ≤ l ≤ 19                             |                                          |
| Reflections collected             | 10581                                                              |                                          |
| Independent reflections           | 2772 [R(int) = 0.0369]                                             |                                          |
| Completeness to theta = 25.08°    | 99.8 %                                                             |                                          |
| Absorption correction             | multi-scan                                                         |                                          |
| Max. and min. transmission        | 0.9731 and 0.8206                                                  |                                          |
| Refinement method                 | Full-matrix least-squares on F <sup>2</sup>                        |                                          |
| Data / restraints / parameters    | 2772 / 0 / 203                                                     |                                          |
| Goodness-of-fit on F <sup>2</sup> | 1.087                                                              |                                          |
| Final R indices [I > 2σ(I)]       | R1 = 0.0391, wR2 = 0.0896                                          |                                          |
| R indices (all data)              | R1 = 0.0553, wR2 = 0.0978                                          |                                          |
| Largest diff. peak and hole       | 0.547 and -0.312 e.Å <sup>-3</sup>                                 |                                          |

**Table S4.** Bond lengths [Å] and angles [°] for **2**

|              |          |                   |            |
|--------------|----------|-------------------|------------|
| C(2)-C(7)    | 1.390(3) | Co(1)-C(1)        | 1.605(9)   |
| C(2)-C(3)    | 1.396(3) | Co(1)-N(1)#1      | 1.793(8)   |
| C(2)-P(1)    | 1.833(2) | Co(1)-N(1)        | 1.793(8)   |
| C(7)-C(6)    | 1.383(4) | Co(1)-P(1)        | 2.2213(6)  |
| C(7)-H(7)    | 0.9500   | Co(1)-P(1)#1      | 2.2213(6)  |
| C(6)-C(5)    | 1.382(4) | C(1)-O(1)         | 1.14(3)    |
| C(6)-H(6)    | 0.9500   | N(1)-O(1')        | 1.20(3)    |
| C(5)-C(4)    | 1.375(4) |                   |            |
| C(5)-H(5)    | 0.9500   | C(7)-C(2)-C(3)    | 118.4(2)   |
| C(4)-C(3)    | 1.388(4) | C(7)-C(2)-P(1)    | 118.51(18) |
| C(4)-H(4)    | 0.9500   | C(3)-C(2)-P(1)    | 123.07(19) |
| C(3)-H(3)    | 0.9500   | C(6)-C(7)-C(2)    | 121.1(2)   |
| C(8)-C(9)    | 1.383(4) | C(6)-C(7)-H(7)    | 119.4      |
| C(8)-C(13)   | 1.393(3) | C(2)-C(7)-H(7)    | 119.4      |
| C(8)-P(1)    | 1.830(2) | C(5)-C(6)-C(7)    | 120.0(2)   |
| C(9)-C(10)   | 1.386(4) | C(5)-C(6)-H(6)    | 120.0      |
| C(9)-H(9)    | 0.9500   | C(7)-C(6)-H(6)    | 120.0      |
| C(10)-C(11)  | 1.375(4) | C(4)-C(5)-C(6)    | 119.5(3)   |
| C(10)-H(10)  | 0.9500   | C(4)-C(5)-H(5)    | 120.2      |
| C(11)-C(12)  | 1.380(4) | C(6)-C(5)-H(5)    | 120.2      |
| C(11)-H(11)  | 0.9500   | C(5)-C(4)-C(3)    | 120.8(2)   |
| C(12)-C(13)  | 1.377(4) | C(5)-C(4)-H(4)    | 119.6      |
| C(12)-H(12)  | 0.9500   | C(3)-C(4)-H(4)    | 119.6      |
| C(13)-H(13)  | 0.9500   | C(4)-C(3)-C(2)    | 120.0(2)   |
| C(14)-C(15)  | 1.385(4) | C(4)-C(3)-H(3)    | 120.0      |
| C(14)-C(19)  | 1.388(4) | C(2)-C(3)-H(3)    | 120.0      |
| C(14)-P(1)   | 1.838(2) | C(9)-C(8)-C(13)   | 118.4(2)   |
| C(15)-C(16)  | 1.387(4) | C(9)-C(8)-P(1)    | 123.75(19) |
| C(15)-H(15)  | 0.9500   | C(13)-C(8)-P(1)   | 117.85(19) |
| C(16)-C(17)  | 1.368(5) | C(8)-C(9)-C(10)   | 120.7(3)   |
| C(16)-H(16)  | 0.9500   | C(8)-C(9)-H(9)    | 119.7      |
| C(17)-C(18)  | 1.373(4) | C(10)-C(9)-H(9)   | 119.7      |
| C(17)-H(17)  | 0.9500   | C(11)-C(10)-C(9)  | 120.2(3)   |
| C(18)-C(19)  | 1.387(4) | C(11)-C(10)-H(10) | 119.9      |
| C(18)-H(18)  | 0.9500   | C(9)-C(10)-H(10)  | 119.9      |
| C(19)-H(19)  | 0.9500   | C(10)-C(11)-C(12) | 119.9(3)   |
| Co(1)-C(1)#1 | 1.605(9) | C(10)-C(11)-H(11) | 120.0      |

|                   |            |                     |            |
|-------------------|------------|---------------------|------------|
| C(12)-C(11)-H(11) | 120.0      | C(14)-C(19)-H(19)   | 119.6      |
| C(13)-C(12)-C(11) | 119.9(3)   | C(1)#1-Co(1)-C(1)   | 112.6(6)   |
| C(13)-C(12)-H(12) | 120.0      | C(1)#1-Co(1)-N(1)#1 | 7.9(4)     |
| C(11)-C(12)-H(12) | 120.0      | C(1)-Co(1)-N(1)#1   | 118.6(3)   |
| C(12)-C(13)-C(8)  | 121.0(2)   | C(1)#1-Co(1)-N(1)   | 118.6(3)   |
| C(12)-C(13)-H(13) | 119.5      | C(1)-Co(1)-N(1)     | 7.9(4)     |
| C(8)-C(13)-H(13)  | 119.5      | N(1)#1-Co(1)-N(1)   | 125.1(4)   |
| C(15)-C(14)-C(19) | 118.6(2)   | C(1)#1-Co(1)-P(1)   | 107.4(3)   |
| C(15)-C(14)-P(1)  | 122.8(2)   | C(1)-Co(1)-P(1)     | 107.8(3)   |
| C(19)-C(14)-P(1)  | 118.56(19) | N(1)#1-Co(1)-P(1)   | 108.8(2)   |
| C(14)-C(15)-C(16) | 120.3(3)   | N(1)-Co(1)-P(1)     | 100.4(2)   |
| C(14)-C(15)-H(15) | 119.9      | C(1)#1-Co(1)-P(1)#1 | 107.8(3)   |
| C(16)-C(15)-H(15) | 119.9      | C(1)-Co(1)-P(1)#1   | 107.4(3)   |
| C(17)-C(16)-C(15) | 120.3(3)   | N(1)#1-Co(1)-P(1)#1 | 100.4(2)   |
| C(17)-C(16)-H(16) | 119.8      | N(1)-Co(1)-P(1)#1   | 108.8(2)   |
| C(15)-C(16)-H(16) | 119.8      | P(1)-Co(1)-P(1)#1   | 113.95(4)  |
| C(16)-C(17)-C(18) | 120.3(3)   | O(1)-C(1)-Co(1)     | 171.3(16)  |
| C(16)-C(17)-H(17) | 119.9      | O(1')-N(1)-Co(1)    | 175.7(14)  |
| C(18)-C(17)-H(17) | 119.9      | C(8)-P(1)-C(2)      | 102.72(11) |
| C(17)-C(18)-C(19) | 119.7(3)   | C(8)-P(1)-C(14)     | 102.53(11) |
| C(17)-C(18)-H(18) | 120.1      | C(2)-P(1)-C(14)     | 101.93(11) |
| C(19)-C(18)-H(18) | 120.1      | C(8)-P(1)-Co(1)     | 117.82(8)  |
| C(18)-C(19)-C(14) | 120.7(3)   | C(2)-P(1)-Co(1)     | 119.74(8)  |
| C(18)-C(19)-H(19) | 119.6      | C(14)-P(1)-Co(1)    | 109.73(8)  |

---

**Table S5.** Crystal data and structure refinement for [(PPh<sub>3</sub>)<sub>2</sub>Co(NO)<sub>2</sub>][BF<sub>4</sub>] (**3**)

|                                   |                                                                                                  |                                            |
|-----------------------------------|--------------------------------------------------------------------------------------------------|--------------------------------------------|
| Identification code               | ic17409                                                                                          |                                            |
| Empirical formula                 | C <sub>36</sub> H <sub>30</sub> B Co F <sub>4</sub> N <sub>2</sub> O <sub>2</sub> P <sub>2</sub> |                                            |
| Formula weight                    | 730.30                                                                                           |                                            |
| Temperature                       | 200(2) K                                                                                         |                                            |
| Wavelength                        | 0.71073 Å                                                                                        |                                            |
| Crystal system                    | Monoclinic                                                                                       |                                            |
| Space group                       | P2(1)/c                                                                                          |                                            |
| Unit cell dimensions              | a = 9.4268(5) Å<br>b = 18.2553(9) Å<br>c = 20.3429(9) Å                                          | α = 90°.<br>β = 101.5090(10)°.<br>γ = 90°. |
| Volume                            | 3430.4(3) Å <sup>3</sup>                                                                         |                                            |
| Z                                 | 4                                                                                                |                                            |
| Density (calculated)              | 1.414 Mg/m <sup>3</sup>                                                                          |                                            |
| Absorption coefficient            | 0.651 mm <sup>-1</sup>                                                                           |                                            |
| F(000)                            | 1496                                                                                             |                                            |
| Crystal size                      | 0.50 x 0.45 x 0.08 mm <sup>3</sup>                                                               |                                            |
| Theta range for data collection   | 1.51 to 27.50°.                                                                                  |                                            |
| Index ranges                      | -12 ≤ h ≤ 12, -23 ≤ k ≤ 23, -26 ≤ l ≤ 25                                                         |                                            |
| Reflections collected             | 26169                                                                                            |                                            |
| Independent reflections           | 7876 [R(int) = 0.0358]                                                                           |                                            |
| Completeness to theta = 27.50°    | 100.0 %                                                                                          |                                            |
| Absorption correction             | Semi-empirical from equivalents                                                                  |                                            |
| Max. and min. transmission        | 0.9498 and 0.7368                                                                                |                                            |
| Refinement method                 | Full-matrix least-squares on F <sup>2</sup>                                                      |                                            |
| Data / restraints / parameters    | 7876 / 0 / 433                                                                                   |                                            |
| Goodness-of-fit on F <sup>2</sup> | 1.017                                                                                            |                                            |
| Final R indices [I > 2σ(I)]       | R1 = 0.0405, wR2 = 0.0972                                                                        |                                            |
| R indices (all data)              | R1 = 0.0520, wR2 = 0.1032                                                                        |                                            |
| Largest diff. peak and hole       | 0.475 and -0.214 e.Å <sup>-3</sup>                                                               |                                            |

**Table S6.** Bond lengths [Å] and angles [°] for **3**

|             |            |                  |            |
|-------------|------------|------------------|------------|
| Co-N(1)     | 1.662(2)   | C(25)-C(30)      | 1.390(3)   |
| Co-N(2)     | 1.6629(19) | C(26)-C(27)      | 1.384(3)   |
| Co-P(2)     | 2.2552(5)  | C(27)-C(28)      | 1.376(3)   |
| Co-P(1)     | 2.3039(6)  | C(28)-C(29)      | 1.374(3)   |
| P(1)-C(13)  | 1.814(2)   | C(29)-C(30)      | 1.384(3)   |
| P(1)-C(1)   | 1.823(2)   | C(31)-C(36)      | 1.391(3)   |
| P(1)-C(7)   | 1.8258(19) | C(31)-C(32)      | 1.395(3)   |
| P(2)-C(31)  | 1.8092(19) | C(32)-C(33)      | 1.387(3)   |
| P(2)-C(19)  | 1.809(2)   | C(33)-C(34)      | 1.372(4)   |
| P(2)-C(25)  | 1.8121(19) | C(34)-C(35)      | 1.381(4)   |
| N(1)-O(1)   | 1.144(3)   | C(35)-C(36)      | 1.380(3)   |
| N(2)-O(2)   | 1.155(2)   | B(1)-F(3)        | 1.366(4)   |
| C(1)-C(2)   | 1.389(3)   | B(1)-F(1)        | 1.367(4)   |
| C(1)-C(6)   | 1.393(3)   | B(1)-F(2)        | 1.369(3)   |
| C(2)-C(3)   | 1.385(3)   | B(1)-F(4)        | 1.371(4)   |
| C(3)-C(4)   | 1.372(4)   |                  |            |
| C(4)-C(5)   | 1.373(4)   | N(1)-Co-N(2)     | 128.76(10) |
| C(5)-C(6)   | 1.382(3)   | N(1)-Co-P(2)     | 98.23(7)   |
| C(7)-C(8)   | 1.383(3)   | N(2)-Co-P(2)     | 101.11(7)  |
| C(7)-C(12)  | 1.393(3)   | N(1)-Co-P(1)     | 107.52(7)  |
| C(8)-C(9)   | 1.389(3)   | N(2)-Co-P(1)     | 110.90(7)  |
| C(9)-C(10)  | 1.372(3)   | P(2)-Co-P(1)     | 107.52(2)  |
| C(10)-C(11) | 1.378(4)   | C(13)-P(1)-C(1)  | 104.90(10) |
| C(11)-C(12) | 1.381(3)   | C(13)-P(1)-C(7)  | 104.57(9)  |
| C(13)-C(18) | 1.392(3)   | C(1)-P(1)-C(7)   | 102.72(9)  |
| C(13)-C(14) | 1.396(3)   | C(13)-P(1)-Co    | 113.29(6)  |
| C(14)-C(15) | 1.384(3)   | C(1)-P(1)-Co     | 118.56(7)  |
| C(15)-C(16) | 1.383(4)   | C(7)-P(1)-Co     | 111.40(7)  |
| C(16)-C(17) | 1.370(4)   | C(31)-P(2)-C(19) | 105.79(9)  |
| C(17)-C(18) | 1.387(3)   | C(31)-P(2)-C(25) | 105.82(9)  |
| C(19)-C(24) | 1.385(3)   | C(19)-P(2)-C(25) | 104.42(9)  |
| C(19)-C(20) | 1.390(3)   | C(31)-P(2)-Co    | 114.95(6)  |
| C(20)-C(21) | 1.381(3)   | C(19)-P(2)-Co    | 115.10(7)  |
| C(21)-C(22) | 1.372(4)   | C(25)-P(2)-Co    | 109.85(6)  |
| C(22)-C(23) | 1.376(4)   | O(1)-N(1)-Co     | 169.54(19) |
| C(23)-C(24) | 1.388(3)   | O(2)-N(2)-Co     | 171.05(19) |
| C(25)-C(26) | 1.383(3)   | C(2)-C(1)-C(6)   | 118.6(2)   |



|                   |            |                   |            |
|-------------------|------------|-------------------|------------|
| C(2)-C(1)-P(1)    | 120.20(17) | C(22)-C(21)-C(20) | 119.5(2)   |
| C(6)-C(1)-P(1)    | 121.06(16) | C(21)-C(22)-C(23) | 120.6(2)   |
| C(3)-C(2)-C(1)    | 120.5(2)   | C(22)-C(23)-C(24) | 120.0(2)   |
| C(4)-C(3)-C(2)    | 120.3(2)   | C(19)-C(24)-C(23) | 120.0(2)   |
| C(3)-C(4)-C(5)    | 119.8(2)   | C(26)-C(25)-C(30) | 119.24(18) |
| C(4)-C(5)-C(6)    | 120.6(2)   | C(26)-C(25)-P(2)  | 121.27(15) |
| C(5)-C(6)-C(1)    | 120.3(2)   | C(30)-C(25)-P(2)  | 119.44(15) |
| C(8)-C(7)-C(12)   | 119.22(19) | C(25)-C(26)-C(27) | 119.9(2)   |
| C(8)-C(7)-P(1)    | 120.28(15) | C(28)-C(27)-C(26) | 120.5(2)   |
| C(12)-C(7)-P(1)   | 120.36(16) | C(29)-C(28)-C(27) | 119.9(2)   |
| C(7)-C(8)-C(9)    | 120.2(2)   | C(28)-C(29)-C(30) | 120.0(2)   |
| C(10)-C(9)-C(8)   | 119.9(2)   | C(29)-C(30)-C(25) | 120.3(2)   |
| C(9)-C(10)-C(11)  | 120.6(2)   | C(36)-C(31)-C(32) | 119.57(19) |
| C(10)-C(11)-C(12) | 119.8(2)   | C(36)-C(31)-P(2)  | 117.94(15) |
| C(11)-C(12)-C(7)  | 120.3(2)   | C(32)-C(31)-P(2)  | 122.40(16) |
| C(18)-C(13)-C(14) | 119.21(19) | C(33)-C(32)-C(31) | 119.5(2)   |
| C(18)-C(13)-P(1)  | 120.34(16) | C(34)-C(33)-C(32) | 120.4(2)   |
| C(14)-C(13)-P(1)  | 120.01(16) | C(33)-C(34)-C(35) | 120.5(2)   |
| C(15)-C(14)-C(13) | 120.1(2)   | C(36)-C(35)-C(34) | 119.8(2)   |
| C(16)-C(15)-C(14) | 120.0(2)   | C(35)-C(36)-C(31) | 120.2(2)   |
| C(17)-C(16)-C(15) | 120.4(2)   | F(3)-B(1)-F(1)    | 107.9(3)   |
| C(16)-C(17)-C(18) | 120.2(2)   | F(3)-B(1)-F(2)    | 110.9(2)   |
| C(17)-C(18)-C(13) | 120.1(2)   | F(1)-B(1)-F(2)    | 107.8(3)   |
| C(24)-C(19)-C(20) | 118.97(19) | F(3)-B(1)-F(4)    | 111.4(3)   |
| C(24)-C(19)-P(2)  | 122.08(16) | F(1)-B(1)-F(4)    | 108.3(3)   |
| C(20)-C(19)-P(2)  | 118.75(15) | F(2)-B(1)-F(4)    | 110.3(2)   |
| C(21)-C(20)-C(19) | 120.8(2)   |                   |            |

---

**Table S7.** Crystal data and structure refinement for (PPh<sub>3</sub>)(SPh)Co(NO)<sub>2</sub> (**4**)

|                                   |                                                                      |                                            |
|-----------------------------------|----------------------------------------------------------------------|--------------------------------------------|
| Identification code               | ic17462                                                              |                                            |
| Empirical formula                 | C <sub>24</sub> H <sub>20</sub> Co N <sub>2</sub> O <sub>2</sub> P S |                                            |
| Formula weight                    | 490.38                                                               |                                            |
| Temperature                       | 150(2) K                                                             |                                            |
| Wavelength                        | 0.71073 Å                                                            |                                            |
| Crystal system                    | Monoclinic                                                           |                                            |
| Space group                       | P2 <sub>1</sub> /c                                                   |                                            |
| Unit cell dimensions              | a = 9.7624(3) Å<br>b = 25.1828(7) Å<br>c = 10.4527(3) Å              | α = 90°.<br>β = 116.6725(12)°.<br>γ = 90°. |
| Volume                            | 2296.28(12) Å <sup>3</sup>                                           |                                            |
| Z                                 | 4                                                                    |                                            |
| Density (calculated)              | 1.418 Mg/m <sup>3</sup>                                              |                                            |
| Absorption coefficient            | 0.931 mm <sup>-1</sup>                                               |                                            |
| F(000)                            | 1008                                                                 |                                            |
| Crystal size                      | 0.200 x 0.150 x 0.060 mm <sup>3</sup>                                |                                            |
| Theta range for data collection   | 1.617 to 27.499°.                                                    |                                            |
| Index ranges                      | -12 ≤ h ≤ 12, -25 ≤ k ≤ 32, -11 ≤ l ≤ 13                             |                                            |
| Reflections collected             | 12760                                                                |                                            |
| Independent reflections           | 5257 [R(int) = 0.0500]                                               |                                            |
| Completeness to theta = 25.242°   | 100.0 %                                                              |                                            |
| Absorption correction             | Semi-empirical from equivalents                                      |                                            |
| Max. and min. transmission        | 0.946 and 0.836                                                      |                                            |
| Refinement method                 | Full-matrix least-squares on F <sup>2</sup>                          |                                            |
| Data / restraints / parameters    | 5257 / 0 / 280                                                       |                                            |
| Goodness-of-fit on F <sup>2</sup> | 0.991                                                                |                                            |
| Final R indices [I > 2σ(I)]       | R1 = 0.0413, wR2 = 0.0899                                            |                                            |
| R indices (all data)              | R1 = 0.0887, wR2 = 0.1143                                            |                                            |
| Extinction coefficient            | n/a                                                                  |                                            |
| Largest diff. peak and hole       | 0.402 and -0.387 e.Å <sup>-3</sup>                                   |                                            |

**Table S8.** Bond lengths [Å] and angles [°] for **4**

|              |            |                   |            |
|--------------|------------|-------------------|------------|
| Co-N(2)      | 1.651(3)   | N(1)-Co-P(1)      | 101.50(8)  |
| Co-N(1)      | 1.663(3)   | N(2)-Co-S(1)      | 112.10(8)  |
| Co-P(1)      | 2.2419(8)  | N(1)-Co-S(1)      | 115.95(9)  |
| Co-S(1)      | 2.2633(8)  | P(1)-Co-S(1)      | 91.27(3)   |
| S(1)-C(1)    | 1.766(3)   | C(1)-S(1)-Co      | 108.38(10) |
| P(1)-C(13)   | 1.816(3)   | C(13)-P(1)-C(19)  | 104.70(12) |
| P(1)-C(19)   | 1.820(3)   | C(13)-P(1)-C(7)   | 104.34(12) |
| P(1)-C(7)    | 1.823(3)   | C(19)-P(1)-C(7)   | 106.05(12) |
| N(1)-O(1)    | 1.164(3)   | C(13)-P(1)-Co     | 113.97(9)  |
| N(2)-O(2)    | 1.162(3)   | C(19)-P(1)-Co     | 112.50(9)  |
| C(1)-C(2)    | 1.383(4)   | C(7)-P(1)-Co      | 114.36(9)  |
| C(1)-C(6)    | 1.395(4)   | O(1)-N(1)-Co      | 163.0(2)   |
| C(2)-C(3)    | 1.384(4)   | O(2)-N(2)-Co      | 170.3(2)   |
| C(3)-C(4)    | 1.379(4)   | C(2)-C(1)-C(6)    | 118.3(3)   |
| C(4)-C(5)    | 1.387(4)   | C(2)-C(1)-S(1)    | 118.6(2)   |
| C(5)-C(6)    | 1.388(4)   | C(6)-C(1)-S(1)    | 123.0(2)   |
| C(7)-C(12)   | 1.382(4)   | C(1)-C(2)-C(3)    | 121.1(3)   |
| C(7)-C(8)    | 1.394(4)   | C(4)-C(3)-C(2)    | 120.4(3)   |
| C(8)-C(9)    | 1.377(4)   | C(3)-C(4)-C(5)    | 119.4(3)   |
| C(9)-C(10)   | 1.378(4)   | C(4)-C(5)-C(6)    | 120.1(3)   |
| C(10)-C(11)  | 1.374(4)   | C(5)-C(6)-C(1)    | 120.6(3)   |
| C(11)-C(12)  | 1.389(4)   | C(12)-C(7)-C(8)   | 119.5(3)   |
| C(13)-C(14)  | 1.388(4)   | C(12)-C(7)-P(1)   | 122.5(2)   |
| C(13)-C(18)  | 1.402(4)   | C(8)-C(7)-P(1)    | 118.0(2)   |
| C(14)-C(15)  | 1.382(4)   | C(9)-C(8)-C(7)    | 119.8(3)   |
| C(15)-C(16)  | 1.365(4)   | C(8)-C(9)-C(10)   | 120.5(3)   |
| C(16)-C(17)  | 1.376(4)   | C(11)-C(10)-C(9)  | 120.0(3)   |
| C(17)-C(18)  | 1.384(4)   | C(10)-C(11)-C(12) | 120.1(3)   |
| C(19)-C(20)  | 1.387(4)   | C(7)-C(12)-C(11)  | 120.1(3)   |
| C(19)-C(24)  | 1.392(4)   | C(14)-C(13)-C(18) | 119.0(3)   |
| C(20)-C(21)  | 1.377(4)   | C(14)-C(13)-P(1)  | 121.6(2)   |
| C(21)-C(22)  | 1.383(4)   | C(18)-C(13)-P(1)  | 119.1(2)   |
| C(22)-C(23)  | 1.373(4)   | C(15)-C(14)-C(13) | 120.2(3)   |
| C(23)-C(24)  | 1.381(4)   | C(16)-C(15)-C(14) | 120.7(3)   |
|              |            | C(15)-C(16)-C(17) | 119.9(3)   |
| N(2)-Co-N(1) | 123.65(11) | C(16)-C(17)-C(18) | 120.7(3)   |
| N(2)-Co-P(1) | 105.15(8)  | C(17)-C(18)-C(13) | 119.5(3)   |

|                   |          |                   |          |
|-------------------|----------|-------------------|----------|
| C(20)-C(19)-C(24) | 118.8(2) | C(20)-C(21)-C(22) | 120.2(3) |
| C(20)-C(19)-P(1)  | 122.7(2) | C(23)-C(22)-C(21) | 119.7(3) |
| C(24)-C(19)-P(1)  | 118.5(2) | C(22)-C(23)-C(24) | 120.5(3) |
| C(21)-C(20)-C(19) | 120.6(3) | C(23)-C(24)-C(19) | 120.2(3) |

---

**Table S9.** Crystal data and structure refinement for [PPh<sub>4</sub>][(SPh)<sub>2</sub>Co(NO)<sub>2</sub>] (**5**)

|                                   |                                                                                   |                                                       |
|-----------------------------------|-----------------------------------------------------------------------------------|-------------------------------------------------------|
| Identification code               | a17474                                                                            |                                                       |
| Empirical formula                 | C <sub>36</sub> H <sub>30</sub> Co N <sub>2</sub> O <sub>2</sub> P S <sub>2</sub> |                                                       |
| Formula weight                    | 676.64                                                                            |                                                       |
| Temperature                       | 200(2) K                                                                          |                                                       |
| Wavelength                        | 0.71073 Å                                                                         |                                                       |
| Crystal system                    | Triclinic                                                                         |                                                       |
| Space group                       | P -1                                                                              |                                                       |
| Unit cell dimensions              | a = 11.051(3) Å<br>b = 16.554(5) Å<br>c = 18.159(5) Å                             | α = 98.004(7)°.<br>β = 92.466(6)°.<br>γ = 97.493(7)°. |
| Volume                            | 3255.1(17) Å <sup>3</sup>                                                         |                                                       |
| Z                                 | 4                                                                                 |                                                       |
| Density (calculated)              | 1.381 Mg/m <sup>3</sup>                                                           |                                                       |
| Absorption coefficient            | 0.740 mm <sup>-1</sup>                                                            |                                                       |
| F(000)                            | 1400                                                                              |                                                       |
| Crystal size                      | 0.29 x 0.14 x 0.02 mm <sup>3</sup>                                                |                                                       |
| Theta range for data collection   | 1.13 to 25.03°.                                                                   |                                                       |
| Index ranges                      | -11 ≤ h ≤ 13, -19 ≤ k ≤ 18, -21 ≤ l ≤ 21                                          |                                                       |
| Reflections collected             | 28704                                                                             |                                                       |
| Independent reflections           | 11299 [R(int) = 0.0843]                                                           |                                                       |
| Completeness to theta = 25.03°    | 98.3 %                                                                            |                                                       |
| Absorption correction             | multi-scan                                                                        |                                                       |
| Max. and min. transmission        | 0.9854 and 0.8140                                                                 |                                                       |
| Refinement method                 | Full-matrix least-squares on F <sup>2</sup>                                       |                                                       |
| Data / restraints / parameters    | 11299 / 3 / 793                                                                   |                                                       |
| Goodness-of-fit on F <sup>2</sup> | 0.962                                                                             |                                                       |
| Final R indices [I > 2σ(I)]       | R1 = 0.0743, wR2 = 0.1051                                                         |                                                       |
| R indices (all data)              | R1 = 0.1903, wR2 = 0.1345                                                         |                                                       |
| Largest diff. peak and hole       | 0.360 and -0.395 e.Å <sup>-3</sup>                                                |                                                       |

**Table S10.** Bond lengths [ $\text{\AA}$ ] and angles [ $^\circ$ ] for **5**

---

|             |          |             |          |
|-------------|----------|-------------|----------|
| C(1)-C(6)   | 1.374(7) | C(19)-C(24) | 1.377(7) |
| C(1)-C(2)   | 1.374(7) | C(19)-S(4)  | 1.757(5) |
| C(1)-S(1)   | 1.760(6) | C(20)-C(21) | 1.371(7) |
| C(2)-C(3)   | 1.369(7) | C(20)-H(20) | 0.9500   |
| C(2)-H(2)   | 0.9500   | C(21)-C(22) | 1.362(8) |
| C(3)-C(4)   | 1.350(7) | C(21)-H(21) | 0.9500   |
| C(3)-H(3)   | 0.9500   | C(22)-C(23) | 1.370(7) |
| C(4)-C(5)   | 1.352(9) | C(22)-H(22) | 0.9500   |
| C(4)-H(4)   | 0.9500   | C(23)-C(24) | 1.366(7) |
| C(5)-C(6)   | 1.380(9) | C(23)-H(23) | 0.9500   |
| C(5)-H(5)   | 0.9500   | C(24)-H(24) | 0.9500   |
| C(6)-H(6)   | 0.9500   | C(25)-C(30) | 1.368(6) |
| C(7)-C(12)  | 1.381(7) | C(25)-C(26) | 1.391(6) |
| C(7)-C(8)   | 1.382(6) | C(25)-P(1)  | 1.783(4) |
| C(7)-S(2)   | 1.745(6) | C(26)-C(27) | 1.374(6) |
| C(8)-C(9)   | 1.384(7) | C(26)-H(26) | 0.9500   |
| C(8)-H(8)   | 0.9500   | C(27)-C(28) | 1.366(6) |
| C(9)-C(10)  | 1.365(8) | C(27)-H(27) | 0.9500   |
| C(9)-H(9)   | 0.9500   | C(28)-C(29) | 1.360(6) |
| C(10)-C(11) | 1.343(8) | C(28)-H(28) | 0.9500   |
| C(10)-H(10) | 0.9500   | C(29)-C(30) | 1.369(6) |
| C(11)-C(12) | 1.388(7) | C(29)-H(29) | 0.9500   |
| C(11)-H(11) | 0.9500   | C(30)-H(30) | 0.9500   |
| C(12)-H(12) | 0.9500   | C(31)-C(32) | 1.378(6) |
| C(13)-C(14) | 1.377(7) | C(31)-C(36) | 1.379(6) |
| C(13)-C(18) | 1.394(7) | C(31)-P(1)  | 1.774(5) |
| C(13)-S(3)  | 1.748(6) | C(32)-C(33) | 1.380(7) |
| C(14)-C(15) | 1.378(7) | C(32)-H(32) | 0.9500   |
| C(14)-H(14) | 0.9500   | C(33)-C(34) | 1.364(7) |
| C(15)-C(16) | 1.362(7) | C(33)-H(33) | 0.9500   |
| C(15)-H(15) | 0.9500   | C(34)-C(35) | 1.368(7) |
| C(16)-C(17) | 1.385(8) | C(34)-H(34) | 0.9500   |
| C(16)-H(16) | 0.9500   | C(35)-C(36) | 1.372(6) |
| C(17)-C(18) | 1.373(8) | C(35)-H(35) | 0.9500   |
| C(17)-H(17) | 0.9500   | C(36)-H(36) | 0.9500   |
| C(18)-H(18) | 0.9500   | C(37)-C(42) | 1.376(6) |
| C(19)-C(20) | 1.370(6) | C(37)-C(38) | 1.379(6) |

|             |          |             |          |
|-------------|----------|-------------|----------|
| C(37)-P(1)  | 1.784(5) | C(56)-H(56) | 0.9500   |
| C(38)-C(39) | 1.369(6) | C(57)-C(58) | 1.359(7) |
| C(38)-H(38) | 0.9500   | C(57)-H(57) | 0.9500   |
| C(39)-C(40) | 1.359(7) | C(58)-C(59) | 1.359(7) |
| C(39)-H(39) | 0.9500   | C(58)-H(58) | 0.9500   |
| C(40)-C(41) | 1.365(7) | C(59)-C(60) | 1.386(6) |
| C(40)-H(40) | 0.9500   | C(59)-H(59) | 0.9500   |
| C(41)-C(42) | 1.378(7) | C(60)-H(60) | 0.9500   |
| C(41)-H(41) | 0.9500   | C(61)-C(62) | 1.377(6) |
| C(42)-H(42) | 0.9500   | C(61)-C(66) | 1.386(6) |
| C(43)-C(48) | 1.383(6) | C(61)-P(2)  | 1.782(5) |
| C(43)-C(44) | 1.385(5) | C(62)-C(63) | 1.364(6) |
| C(43)-P(1)  | 1.779(5) | C(62)-H(62) | 0.9500   |
| C(44)-C(45) | 1.373(6) | C(63)-C(64) | 1.356(7) |
| C(44)-H(44) | 0.9500   | C(63)-H(63) | 0.9500   |
| C(45)-C(46) | 1.368(6) | C(64)-C(65) | 1.365(7) |
| C(45)-H(45) | 0.9500   | C(64)-H(64) | 0.9500   |
| C(46)-C(47) | 1.363(6) | C(65)-C(66) | 1.375(6) |
| C(46)-H(46) | 0.9500   | C(65)-H(65) | 0.9500   |
| C(47)-C(48) | 1.374(6) | C(66)-H(66) | 0.9500   |
| C(47)-H(47) | 0.9500   | C(67)-C(72) | 1.376(6) |
| C(48)-H(48) | 0.9500   | C(67)-C(68) | 1.384(6) |
| C(49)-C(50) | 1.374(6) | C(67)-P(2)  | 1.774(5) |
| C(49)-C(54) | 1.383(6) | C(68)-C(69) | 1.374(6) |
| C(49)-P(2)  | 1.787(5) | C(68)-H(68) | 0.9500   |
| C(50)-C(51) | 1.370(6) | C(69)-C(70) | 1.367(7) |
| C(50)-H(50) | 0.9500   | C(69)-H(69) | 0.9500   |
| C(51)-C(52) | 1.370(7) | C(70)-C(71) | 1.366(7) |
| C(51)-H(51) | 0.9500   | C(70)-H(70) | 0.9500   |
| C(52)-C(53) | 1.348(7) | C(71)-C(72) | 1.369(6) |
| C(52)-H(52) | 0.9500   | C(71)-H(71) | 0.9500   |
| C(53)-C(54) | 1.382(7) | C(72)-H(72) | 0.9500   |
| C(53)-H(53) | 0.9500   | N(1)-O(1)   | 1.130(5) |
| C(54)-H(54) | 0.9500   | N(1)-Co(1)  | 1.624(6) |
| C(55)-C(60) | 1.386(6) | N(2)-O(2)   | 1.116(5) |
| C(55)-C(56) | 1.388(6) | N(2)-Co(1)  | 1.684(6) |
| C(55)-P(2)  | 1.773(5) | N(3)-O(3)   | 1.112(5) |
| C(56)-C(57) | 1.371(6) | N(3)-Co(2)  | 1.637(6) |

|                   |            |                   |          |
|-------------------|------------|-------------------|----------|
| N(4)-O(4)         | 1.124(4)   | C(10)-C(11)-H(11) | 119.4    |
| N(4)-Co(2)        | 1.650(5)   | C(12)-C(11)-H(11) | 119.4    |
| S(1)-Co(1)        | 2.2544(19) | C(7)-C(12)-C(11)  | 121.3(5) |
| S(2)-Co(1)        | 2.2479(14) | C(7)-C(12)-H(12)  | 119.3    |
| S(3)-Co(2)        | 2.2569(17) | C(11)-C(12)-H(12) | 119.3    |
| S(4)-Co(2)        | 2.2467(17) | C(14)-C(13)-C(18) | 117.4(6) |
|                   |            | C(14)-C(13)-S(3)  | 123.8(5) |
| C(6)-C(1)-C(2)    | 117.4(6)   | C(18)-C(13)-S(3)  | 118.8(6) |
| C(6)-C(1)-S(1)    | 118.0(6)   | C(13)-C(14)-C(15) | 121.3(6) |
| C(2)-C(1)-S(1)    | 124.5(5)   | C(13)-C(14)-H(14) | 119.3    |
| C(3)-C(2)-C(1)    | 121.5(6)   | C(15)-C(14)-H(14) | 119.3    |
| C(3)-C(2)-H(2)    | 119.2      | C(16)-C(15)-C(14) | 120.6(7) |
| C(1)-C(2)-H(2)    | 119.2      | C(16)-C(15)-H(15) | 119.7    |
| C(4)-C(3)-C(2)    | 120.3(6)   | C(14)-C(15)-H(15) | 119.7    |
| C(4)-C(3)-H(3)    | 119.8      | C(15)-C(16)-C(17) | 119.6(7) |
| C(2)-C(3)-H(3)    | 119.8      | C(15)-C(16)-H(16) | 120.2    |
| C(3)-C(4)-C(5)    | 119.4(7)   | C(17)-C(16)-H(16) | 120.2    |
| C(3)-C(4)-H(4)    | 120.3      | C(18)-C(17)-C(16) | 119.5(7) |
| C(5)-C(4)-H(4)    | 120.3      | C(18)-C(17)-H(17) | 120.2    |
| C(4)-C(5)-C(6)    | 120.8(7)   | C(16)-C(17)-H(17) | 120.2    |
| C(4)-C(5)-H(5)    | 119.6      | C(17)-C(18)-C(13) | 121.6(6) |
| C(6)-C(5)-H(5)    | 119.6      | C(17)-C(18)-H(18) | 119.2    |
| C(1)-C(6)-C(5)    | 120.4(7)   | C(13)-C(18)-H(18) | 119.2    |
| C(1)-C(6)-H(6)    | 119.8      | C(20)-C(19)-C(24) | 116.3(5) |
| C(5)-C(6)-H(6)    | 119.8      | C(20)-C(19)-S(4)  | 120.2(5) |
| C(12)-C(7)-C(8)   | 116.8(5)   | C(24)-C(19)-S(4)  | 123.4(5) |
| C(12)-C(7)-S(2)   | 124.2(4)   | C(21)-C(20)-C(19) | 122.4(5) |
| C(8)-C(7)-S(2)    | 119.0(5)   | C(21)-C(20)-H(20) | 118.8    |
| C(9)-C(8)-C(7)    | 120.8(6)   | C(19)-C(20)-H(20) | 118.8    |
| C(9)-C(8)-H(8)    | 119.6      | C(22)-C(21)-C(20) | 120.5(6) |
| C(7)-C(8)-H(8)    | 119.6      | C(22)-C(21)-H(21) | 119.7    |
| C(10)-C(9)-C(8)   | 121.2(6)   | C(20)-C(21)-H(21) | 119.7    |
| C(10)-C(9)-H(9)   | 119.4      | C(21)-C(22)-C(23) | 118.0(6) |
| C(8)-C(9)-H(9)    | 119.4      | C(21)-C(22)-H(22) | 121.0    |
| C(11)-C(10)-C(9)  | 118.7(7)   | C(23)-C(22)-H(22) | 121.0    |
| C(11)-C(10)-H(10) | 120.7      | C(24)-C(23)-C(22) | 121.2(6) |
| C(9)-C(10)-H(10)  | 120.7      | C(24)-C(23)-H(23) | 119.4    |
| C(10)-C(11)-C(12) | 121.1(7)   | C(22)-C(23)-H(23) | 119.4    |



|                   |          |                   |          |
|-------------------|----------|-------------------|----------|
| C(23)-C(24)-C(19) | 121.5(5) | C(31)-C(36)-H(36) | 119.3    |
| C(23)-C(24)-H(24) | 119.2    | C(42)-C(37)-C(38) | 119.5(5) |
| C(19)-C(24)-H(24) | 119.2    | C(42)-C(37)-P(1)  | 121.2(4) |
| C(30)-C(25)-C(26) | 118.7(4) | C(38)-C(37)-P(1)  | 119.3(4) |
| C(30)-C(25)-P(1)  | 122.0(4) | C(39)-C(38)-C(37) | 120.6(5) |
| C(26)-C(25)-P(1)  | 119.3(4) | C(39)-C(38)-H(38) | 119.7    |
| C(27)-C(26)-C(25) | 120.2(5) | C(37)-C(38)-H(38) | 119.7    |
| C(27)-C(26)-H(26) | 119.9    | C(40)-C(39)-C(38) | 119.6(6) |
| C(25)-C(26)-H(26) | 119.9    | C(40)-C(39)-H(39) | 120.2    |
| C(28)-C(27)-C(26) | 120.0(5) | C(38)-C(39)-H(39) | 120.2    |
| C(28)-C(27)-H(27) | 120.0    | C(39)-C(40)-C(41) | 120.6(6) |
| C(26)-C(27)-H(27) | 120.0    | C(39)-C(40)-H(40) | 119.7    |
| C(29)-C(28)-C(27) | 120.0(5) | C(41)-C(40)-H(40) | 119.7    |
| C(29)-C(28)-H(28) | 120.0    | C(40)-C(41)-C(42) | 120.4(6) |
| C(27)-C(28)-H(28) | 120.0    | C(40)-C(41)-H(41) | 119.8    |
| C(28)-C(29)-C(30) | 120.5(5) | C(42)-C(41)-H(41) | 119.8    |
| C(28)-C(29)-H(29) | 119.7    | C(37)-C(42)-C(41) | 119.3(5) |
| C(30)-C(29)-H(29) | 119.7    | C(37)-C(42)-H(42) | 120.4    |
| C(25)-C(30)-C(29) | 120.5(5) | C(41)-C(42)-H(42) | 120.4    |
| C(25)-C(30)-H(30) | 119.7    | C(48)-C(43)-C(44) | 118.8(4) |
| C(29)-C(30)-H(30) | 119.7    | C(48)-C(43)-P(1)  | 121.4(4) |
| C(32)-C(31)-C(36) | 118.1(5) | C(44)-C(43)-P(1)  | 119.7(4) |
| C(32)-C(31)-P(1)  | 118.8(4) | C(45)-C(44)-C(43) | 120.2(5) |
| C(36)-C(31)-P(1)  | 123.1(4) | C(45)-C(44)-H(44) | 119.9    |
| C(33)-C(32)-C(31) | 120.5(5) | C(43)-C(44)-H(44) | 119.9    |
| C(33)-C(32)-H(32) | 119.7    | C(46)-C(45)-C(44) | 120.5(5) |
| C(31)-C(32)-H(32) | 119.7    | C(46)-C(45)-H(45) | 119.8    |
| C(34)-C(33)-C(32) | 120.3(6) | C(44)-C(45)-H(45) | 119.8    |
| C(34)-C(33)-H(33) | 119.9    | C(47)-C(46)-C(45) | 119.7(5) |
| C(32)-C(33)-H(33) | 119.9    | C(47)-C(46)-H(46) | 120.1    |
| C(33)-C(34)-C(35) | 120.1(6) | C(45)-C(46)-H(46) | 120.1    |
| C(33)-C(34)-H(34) | 120.0    | C(46)-C(47)-C(48) | 120.6(5) |
| C(35)-C(34)-H(34) | 120.0    | C(46)-C(47)-H(47) | 119.7    |
| C(34)-C(35)-C(36) | 119.6(6) | C(48)-C(47)-H(47) | 119.7    |
| C(34)-C(35)-H(35) | 120.2    | C(47)-C(48)-C(43) | 120.2(4) |
| C(36)-C(35)-H(35) | 120.2    | C(47)-C(48)-H(48) | 119.9    |
| C(35)-C(36)-C(31) | 121.4(5) | C(43)-C(48)-H(48) | 119.9    |
| C(35)-C(36)-H(36) | 119.3    | C(50)-C(49)-C(54) | 118.8(4) |

|                   |          |                   |          |
|-------------------|----------|-------------------|----------|
| C(50)-C(49)-P(2)  | 120.5(4) | C(63)-C(62)-C(61) | 120.4(5) |
| C(54)-C(49)-P(2)  | 120.7(4) | C(63)-C(62)-H(62) | 119.8    |
| C(51)-C(50)-C(49) | 121.2(5) | C(61)-C(62)-H(62) | 119.8    |
| C(51)-C(50)-H(50) | 119.4    | C(64)-C(63)-C(62) | 121.1(6) |
| C(49)-C(50)-H(50) | 119.4    | C(64)-C(63)-H(63) | 119.4    |
| C(50)-C(51)-C(52) | 119.1(5) | C(62)-C(63)-H(63) | 119.4    |
| C(50)-C(51)-H(51) | 120.4    | C(63)-C(64)-C(65) | 119.2(5) |
| C(52)-C(51)-H(51) | 120.4    | C(63)-C(64)-H(64) | 120.4    |
| C(53)-C(52)-C(51) | 120.9(5) | C(65)-C(64)-H(64) | 120.4    |
| C(53)-C(52)-H(52) | 119.5    | C(64)-C(65)-C(66) | 120.9(5) |
| C(51)-C(52)-H(52) | 119.5    | C(64)-C(65)-H(65) | 119.6    |
| C(52)-C(53)-C(54) | 120.3(5) | C(66)-C(65)-H(65) | 119.6    |
| C(52)-C(53)-H(53) | 119.9    | C(65)-C(66)-C(61) | 119.6(5) |
| C(54)-C(53)-H(53) | 119.9    | C(65)-C(66)-H(66) | 120.2    |
| C(53)-C(54)-C(49) | 119.7(5) | C(61)-C(66)-H(66) | 120.2    |
| C(53)-C(54)-H(54) | 120.1    | C(72)-C(67)-C(68) | 119.8(5) |
| C(49)-C(54)-H(54) | 120.1    | C(72)-C(67)-P(2)  | 120.8(4) |
| C(60)-C(55)-C(56) | 118.7(5) | C(68)-C(67)-P(2)  | 119.1(4) |
| C(60)-C(55)-P(2)  | 123.1(4) | C(69)-C(68)-C(67) | 119.7(5) |
| C(56)-C(55)-P(2)  | 118.2(4) | C(69)-C(68)-H(68) | 120.2    |
| C(57)-C(56)-C(55) | 120.5(5) | C(67)-C(68)-H(68) | 120.2    |
| C(57)-C(56)-H(56) | 119.7    | C(70)-C(69)-C(68) | 120.6(5) |
| C(55)-C(56)-H(56) | 119.7    | C(70)-C(69)-H(69) | 119.7    |
| C(58)-C(57)-C(56) | 119.7(5) | C(68)-C(69)-H(69) | 119.7    |
| C(58)-C(57)-H(57) | 120.2    | C(69)-C(70)-C(71) | 119.2(5) |
| C(56)-C(57)-H(57) | 120.2    | C(69)-C(70)-H(70) | 120.4    |
| C(57)-C(58)-C(59) | 121.5(6) | C(71)-C(70)-H(70) | 120.4    |
| C(57)-C(58)-H(58) | 119.2    | C(70)-C(71)-C(72) | 121.5(5) |
| C(59)-C(58)-H(58) | 119.2    | C(70)-C(71)-H(71) | 119.2    |
| C(58)-C(59)-C(60) | 119.4(5) | C(72)-C(71)-H(71) | 119.2    |
| C(58)-C(59)-H(59) | 120.3    | C(71)-C(72)-C(67) | 119.2(5) |
| C(60)-C(59)-H(59) | 120.3    | C(71)-C(72)-H(72) | 120.4    |
| C(55)-C(60)-C(59) | 120.2(5) | C(67)-C(72)-H(72) | 120.4    |
| C(55)-C(60)-H(60) | 119.9    | O(1)-N(1)-Co(1)   | 175.9(5) |
| C(59)-C(60)-H(60) | 119.9    | O(2)-N(2)-Co(1)   | 156.9(5) |
| C(62)-C(61)-C(66) | 118.8(5) | O(3)-N(3)-Co(2)   | 168.8(6) |
| C(62)-C(61)-P(2)  | 121.2(4) | O(4)-N(4)-Co(2)   | 168.1(5) |
| C(66)-C(61)-P(2)  | 120.0(4) | C(31)-P(1)-C(43)  | 108.7(2) |

|                  |            |
|------------------|------------|
| C(31)-P(1)-C(25) | 110.5(2)   |
| C(43)-P(1)-C(25) | 108.9(2)   |
| C(31)-P(1)-C(37) | 111.6(2)   |
| C(43)-P(1)-C(37) | 109.0(2)   |
| C(25)-P(1)-C(37) | 108.1(2)   |
| C(55)-P(2)-C(67) | 109.1(2)   |
| C(55)-P(2)-C(61) | 110.3(2)   |
| C(67)-P(2)-C(61) | 107.2(2)   |
| C(55)-P(2)-C(49) | 109.4(2)   |
| C(67)-P(2)-C(49) | 112.1(2)   |
| C(61)-P(2)-C(49) | 108.8(2)   |
| C(1)-S(1)-Co(1)  | 109.5(2)   |
| C(7)-S(2)-Co(1)  | 109.21(19) |
| C(13)-S(3)-Co(2) | 109.0(2)   |
| C(19)-S(4)-Co(2) | 105.08(17) |
| N(1)-Co(1)-N(2)  | 114.7(3)   |
| N(1)-Co(1)-S(2)  | 111.84(17) |
| N(2)-Co(1)-S(2)  | 110.30(17) |
| N(1)-Co(1)-S(1)  | 110.8(2)   |
| N(2)-Co(1)-S(1)  | 116.67(18) |
| S(2)-Co(1)-S(1)  | 89.95(6)   |
| N(3)-Co(2)-N(4)  | 112.9(3)   |
| N(3)-Co(2)-S(4)  | 110.89(19) |
| N(4)-Co(2)-S(4)  | 112.57(18) |
| N(3)-Co(2)-S(3)  | 113.7(2)   |
| N(4)-Co(2)-S(3)  | 113.29(16) |
| S(4)-Co(2)-S(3)  | 91.68(7)   |

**Table S11.** Crystal data and structure refinement for [(dppe)Co(NO)<sub>2</sub>][BF<sub>4</sub>] (dppe = 1,2-Bis(diphenylphosphino)ethan).

|                                   |                                                                                                        |
|-----------------------------------|--------------------------------------------------------------------------------------------------------|
| Identification code               | ic17153                                                                                                |
| Empirical formula                 | C <sub>27</sub> H <sub>24</sub> Co N O <sub>2</sub> P <sub>2</sub>                                     |
| Formula weight                    | 515.34                                                                                                 |
| Temperature                       | 150(2) K                                                                                               |
| Wavelength                        | 0.71073 Å                                                                                              |
| Crystal system                    | Monoclinic                                                                                             |
| Space group                       | P2(1)/n                                                                                                |
| Unit cell dimensions              | a = 12.3657(7) Å    α = 90°.<br>b = 15.6438(9) Å    β = 108.1441(12)°.<br>c = 13.0824(7) Å    γ = 90°. |
| Volume                            | 2404.9(2) Å <sup>3</sup>                                                                               |
| Z                                 | 4                                                                                                      |
| Density (calculated)              | 1.423 Mg/m <sup>3</sup>                                                                                |
| Absorption coefficient            | 0.872 mm <sup>-1</sup>                                                                                 |
| F(000)                            | 1064                                                                                                   |
| Crystal size                      | 0.28 x 0.14 x 0.12 mm <sup>3</sup>                                                                     |
| Theta range for data collection   | 1.98 to 27.50°.                                                                                        |
| Index ranges                      | -15 ≤ h ≤ 16, -20 ≤ k ≤ 20, -16 ≤ l ≤ 15                                                               |
| Reflections collected             | 18341                                                                                                  |
| Independent reflections           | 5513 [R(int) = 0.0400]                                                                                 |
| Completeness to theta = 27.50°    | 99.9 %                                                                                                 |
| Absorption correction             | Semi-empirical from equivalents                                                                        |
| Max. and min. transmission        | 0.9026 and 0.7924                                                                                      |
| Refinement method                 | Full-matrix least-squares on F <sup>2</sup>                                                            |
| Data / restraints / parameters    | 5513 / 0 / 298                                                                                         |
| Goodness-of-fit on F <sup>2</sup> | 1.129                                                                                                  |
| Final R indices [I > 2σ(I)]       | R1 = 0.0412, wR2 = 0.0878                                                                              |
| R indices (all data)              | R1 = 0.0483, wR2 = 0.0910                                                                              |
| Largest diff. peak and hole       | 0.445 and -0.272 e.Å <sup>-3</sup>                                                                     |

**Table S12.** Bond lengths [Å] and angles [°] for [(dppe)Co(NO)<sub>2</sub>][BF<sub>4</sub>] (dppe = 1,2-Bis(diphenylphosphino)ethan).

|             |            |                   |            |
|-------------|------------|-------------------|------------|
| Co-N(1)     | 1.6454(19) | C(25)-C(26)       | 1.380(3)   |
| Co-C(1)     | 1.763(2)   | C(26)-C(27)       | 1.384(3)   |
| Co-P(1)     | 2.1997(6)  |                   |            |
| Co-P(2)     | 2.1998(6)  | N(1)-Co-C(1)      | 121.88(10) |
| P(1)-C(4)   | 1.824(2)   | N(1)-Co-P(1)      | 118.72(7)  |
| P(1)-C(10)  | 1.830(2)   | C(1)-Co-P(1)      | 102.36(8)  |
| P(1)-C(2)   | 1.840(2)   | N(1)-Co-P(2)      | 121.50(7)  |
| P(2)-C(22)  | 1.826(2)   | C(1)-Co-P(2)      | 97.86(7)   |
| P(2)-C(16)  | 1.827(2)   | P(1)-Co-P(2)      | 87.66(2)   |
| P(2)-C(3)   | 1.843(2)   | C(4)-P(1)-C(10)   | 104.00(10) |
| N(1)-O(2)   | 1.178(2)   | C(4)-P(1)-C(2)    | 105.19(10) |
| C(1)-O(1)   | 1.152(3)   | C(10)-P(1)-C(2)   | 103.76(10) |
| C(2)-C(3)   | 1.533(3)   | C(4)-P(1)-Co      | 119.98(7)  |
| C(4)-C(5)   | 1.395(3)   | C(10)-P(1)-Co     | 116.07(7)  |
| C(4)-C(9)   | 1.396(3)   | C(2)-P(1)-Co      | 106.24(7)  |
| C(5)-C(6)   | 1.387(3)   | C(22)-P(2)-C(16)  | 101.88(9)  |
| C(6)-C(7)   | 1.378(3)   | C(22)-P(2)-C(3)   | 104.20(10) |
| C(7)-C(8)   | 1.380(4)   | C(16)-P(2)-C(3)   | 106.01(10) |
| C(8)-C(9)   | 1.384(3)   | C(22)-P(2)-Co     | 120.52(7)  |
| C(10)-C(15) | 1.389(3)   | C(16)-P(2)-Co     | 114.73(7)  |
| C(10)-C(11) | 1.391(3)   | C(3)-P(2)-Co      | 108.21(7)  |
| C(11)-C(12) | 1.389(3)   | O(2)-N(1)-Co      | 178.4(2)   |
| C(12)-C(13) | 1.373(4)   | O(1)-C(1)-Co      | 177.9(2)   |
| C(13)-C(14) | 1.380(4)   | C(3)-C(2)-P(1)    | 107.38(14) |
| C(14)-C(15) | 1.387(3)   | C(2)-C(3)-P(2)    | 109.27(14) |
| C(16)-C(17) | 1.386(3)   | C(5)-C(4)-C(9)    | 118.9(2)   |
| C(16)-C(21) | 1.395(3)   | C(5)-C(4)-P(1)    | 117.71(16) |
| C(17)-C(18) | 1.392(3)   | C(9)-C(4)-P(1)    | 123.39(17) |
| C(18)-C(19) | 1.376(4)   | C(6)-C(5)-C(4)    | 120.4(2)   |
| C(19)-C(20) | 1.379(4)   | C(7)-C(6)-C(5)    | 120.2(2)   |
| C(20)-C(21) | 1.385(3)   | C(6)-C(7)-C(8)    | 119.9(2)   |
| C(22)-C(23) | 1.385(3)   | C(7)-C(8)-C(9)    | 120.6(2)   |
| C(22)-C(27) | 1.392(3)   | C(8)-C(9)-C(4)    | 120.1(2)   |
| C(23)-C(24) | 1.387(3)   | C(15)-C(10)-C(11) | 118.6(2)   |
| C(24)-C(25) | 1.384(4)   | C(15)-C(10)-P(1)  | 118.30(16) |

|                   |            |                   |            |
|-------------------|------------|-------------------|------------|
| C(11)-C(10)-P(1)  | 123.11(18) | C(18)-C(19)-C(20) | 119.8(2)   |
| C(12)-C(11)-C(10) | 120.4(2)   | C(19)-C(20)-C(21) | 120.1(2)   |
| C(13)-C(12)-C(11) | 120.3(2)   | C(20)-C(21)-C(16) | 120.7(2)   |
| C(12)-C(13)-C(14) | 120.0(2)   | C(23)-C(22)-C(27) | 119.1(2)   |
| C(13)-C(14)-C(15) | 120.0(3)   | C(23)-C(22)-P(2)  | 120.31(17) |
| C(14)-C(15)-C(10) | 120.8(2)   | C(27)-C(22)-P(2)  | 120.63(16) |
| C(17)-C(16)-C(21) | 118.7(2)   | C(22)-C(23)-C(24) | 120.5(2)   |
| C(17)-C(16)-P(2)  | 124.47(17) | C(25)-C(24)-C(23) | 120.1(2)   |
| C(21)-C(16)-P(2)  | 116.78(17) | C(26)-C(25)-C(24) | 119.8(2)   |
| C(16)-C(17)-C(18) | 120.3(2)   | C(25)-C(26)-C(27) | 120.2(2)   |
| C(19)-C(18)-C(17) | 120.4(2)   | C(26)-C(27)-C(22) | 120.4(2)   |

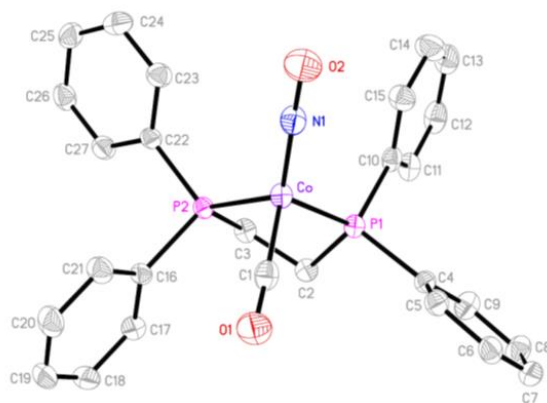

**Figure S1.** The Molecular Structure of  $[(dppe)Co(NO)_2][BF_4]$  (dppe = 1,2-Bis(diphenylphosphino)ethan)

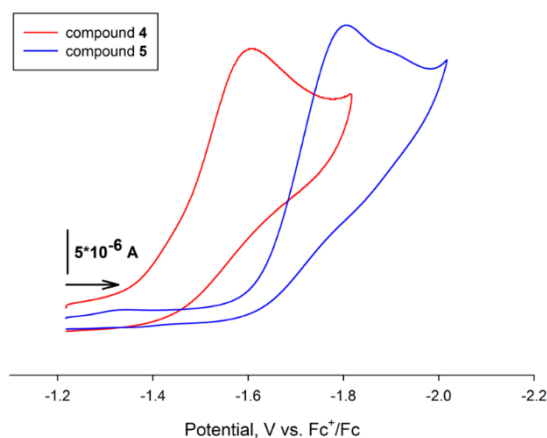

**Figure S2.** Overlay of cyclic voltammograms of complexes **4** (red) and complex **5** (blue) at scan rate 100 mV/s in 2 mM  $CH_2Cl_2$  solution, referenced to  $Fc/Fc^+$ .

31P of A

M 97

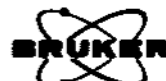

```
EXFNO 20151013
EXPNO 11
PROCNO 1
Date_ 20151013
Time 10.15
INSTRUM spect
PROBHD 5 mm PABBO BB-
PULPROG zg30
TD 65536
SOLVENT CDCl3
DE 554
DS 4
SWH 97087.378 Hz
FIDRES 1.481436 Hz
AQ 0.1378666 sec
RG 2100
DM 5.180 usec
DE 8.50 usec
TE 300.0 K
D1 2.0000000 sec
TD0 1
```

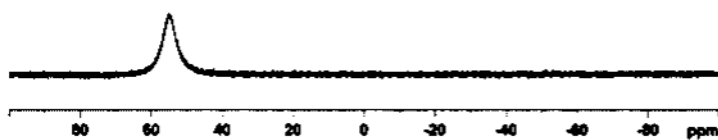

Figure S3P. The  $^{31}\text{P}$  NMR spectrum of complex 1 in  $\text{CDCl}_3$

(PPh<sub>3</sub>)Co(CO)<sub>2</sub>(NO) / CD<sub>2</sub>Cl<sub>2</sub>

7.410  
7.342  
7.286  
6.971  
5.315

1.561  
1.406  
1.258  
0.860

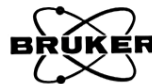

```
Current Data Parameters
NAME 20230719
EXPNO 3
PROCNO 1

F2 - Acquisition Parameters
Date_ 20230719
Time 19.13 h
INSTRUM AVNBO100
PROBHD z551701_0046 (
PULPROG zg30
TD 32768
SOLVENT CD2Cl2
NS 32
DS 0
SWH 5882.353 Hz
FIDRES 0.359030 Hz
AQ 2.7852800 sec
RG 101
DM 85.000 usec
DE 8.07 usec
TE 295.6 K
D1 2.0000000 sec
TD0 1
SFO1 300.1318008 MHz
NUC1 1H
PO 5.00 usec
P1 15.00 usec
PLW1 9.08119965 W

F2 - Processing parameters
SI 16384
SF 300.1300128 MHz
WEN EM
SSB 0
LB 0 Hz
GB 0
PC 1.00
```

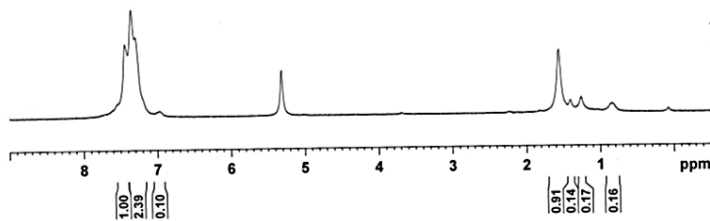

Figure S3H. The  $^1\text{H}$  NMR spectrum of complex 1 in  $\text{CD}_2\text{Cl}_2$

31P of

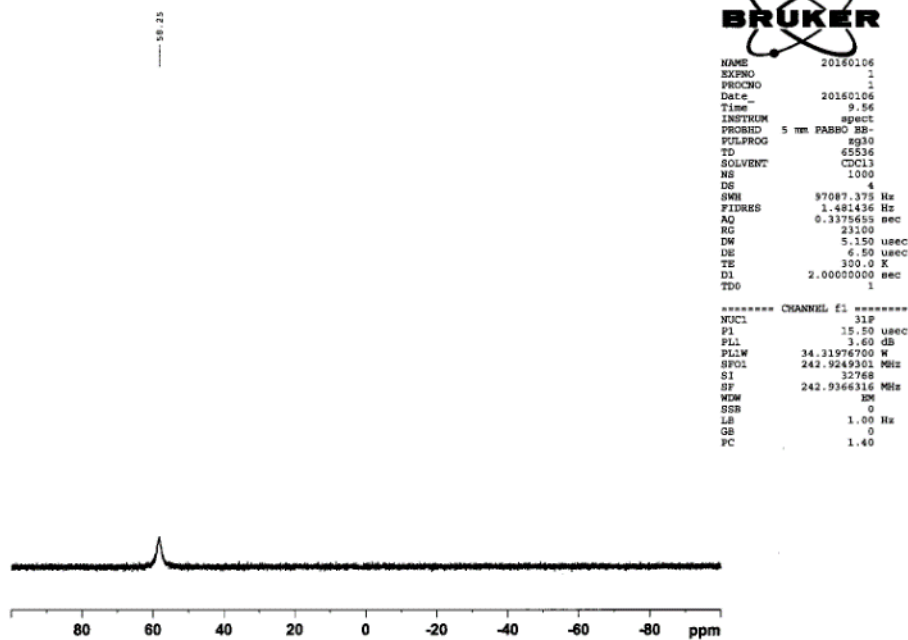

Figure S4P. The  $^{31}\text{P}$  NMR spectrum of complex **2** in  $\text{CDCl}_3$

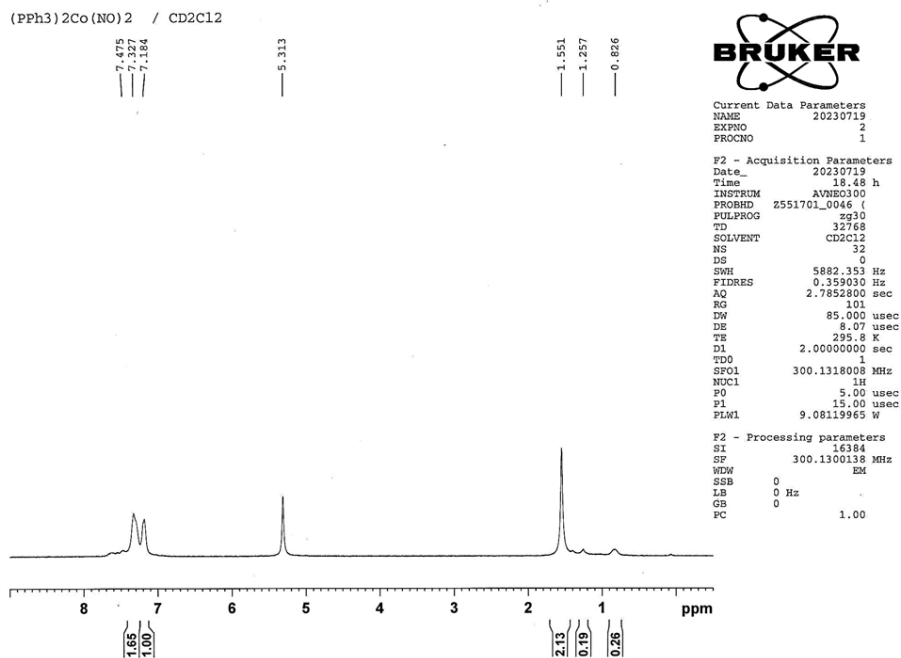

Figure S4H. The  $^1\text{H}$  NMR spectrum of complex **2** in  $\text{CD}_2\text{Cl}_2$



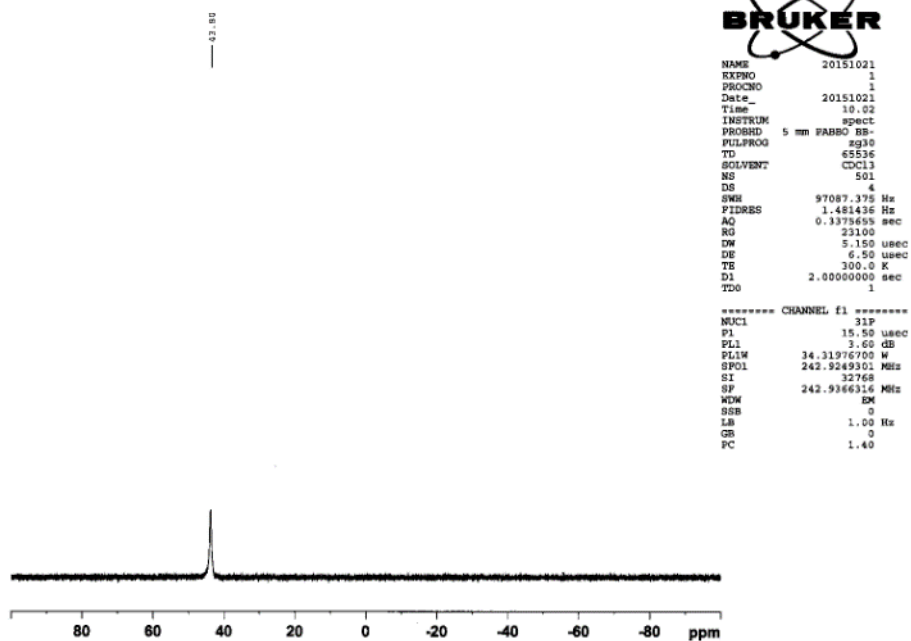Figure S5P. The  $^{31}\text{P}$  NMR spectrum of complex **3** in  $\text{CDCl}_3$ 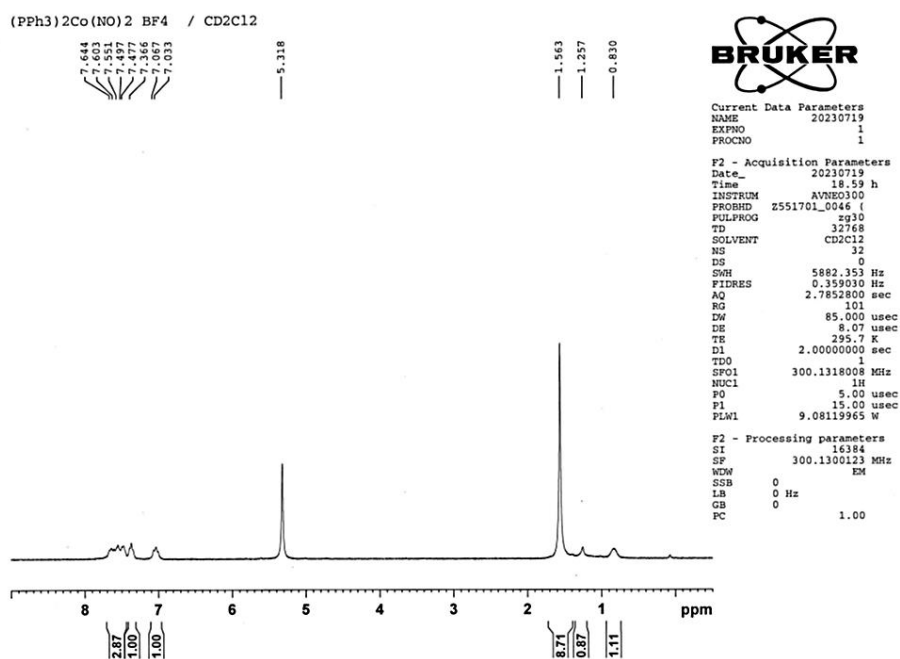Figure S5H. The  $^1\text{H}$  NMR spectrum of complex **3** in  $\text{CD}_2\text{Cl}_2$

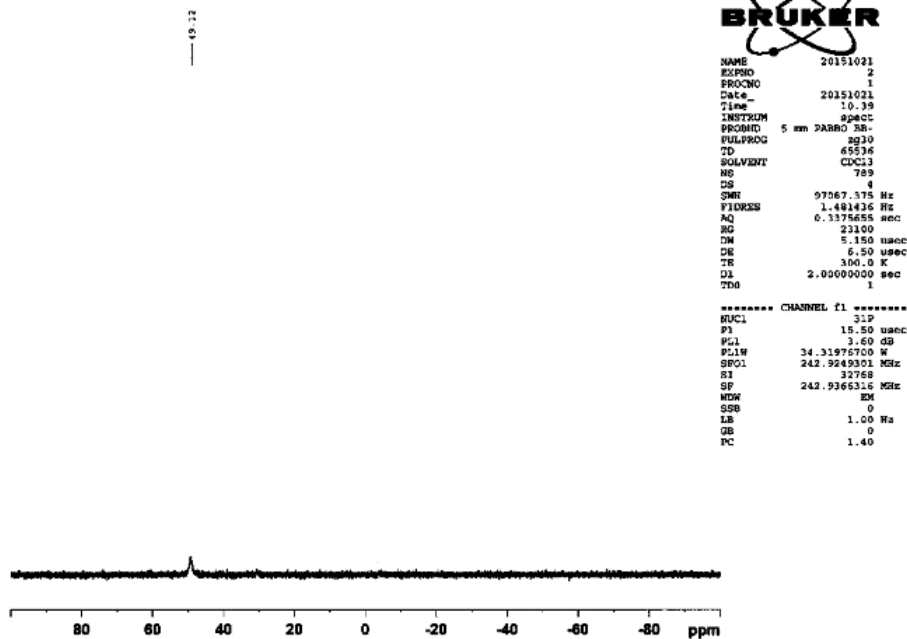Figure S5P. The  $^{31}\text{P}$  NMR spectrum of complex 4 in  $\text{CDCl}_3$ 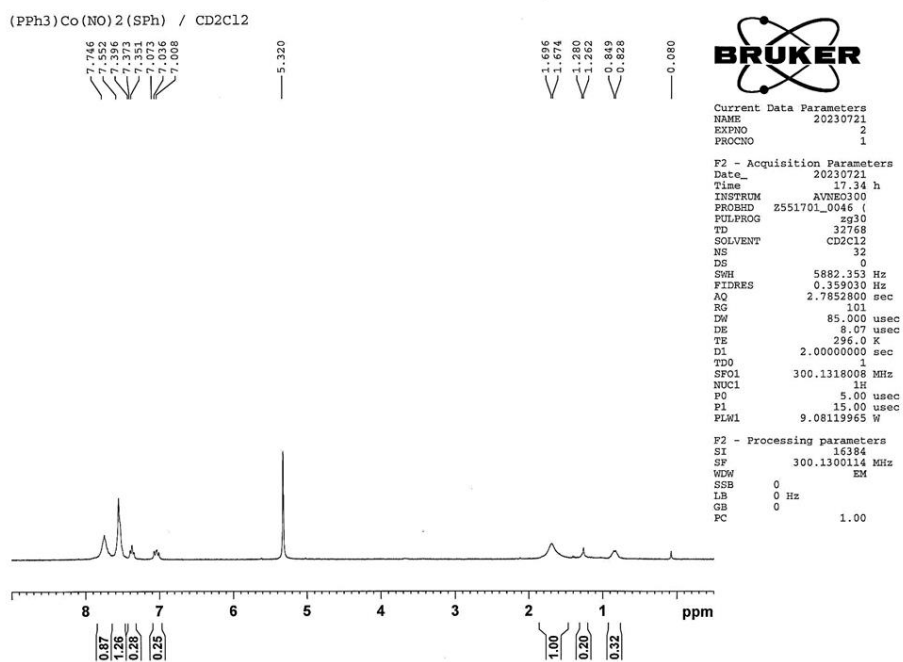Figure S5H. The  $^1\text{H}$  NMR spectrum of complex 4 in  $\text{CD}_2\text{Cl}_2$

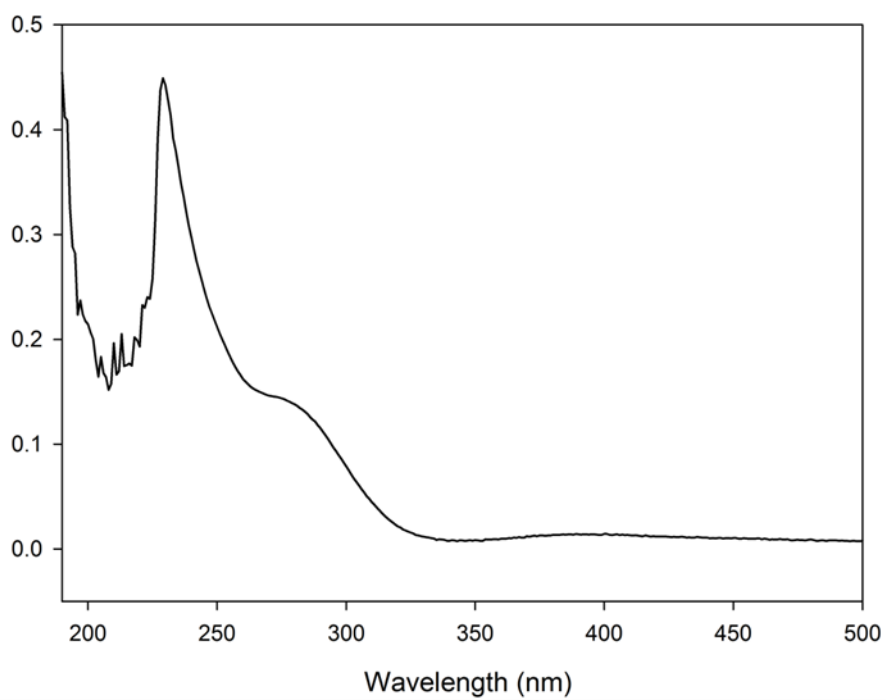

**Figure S6.** The UV spectrum of complex **1** in CH<sub>2</sub>Cl<sub>2</sub> solution.

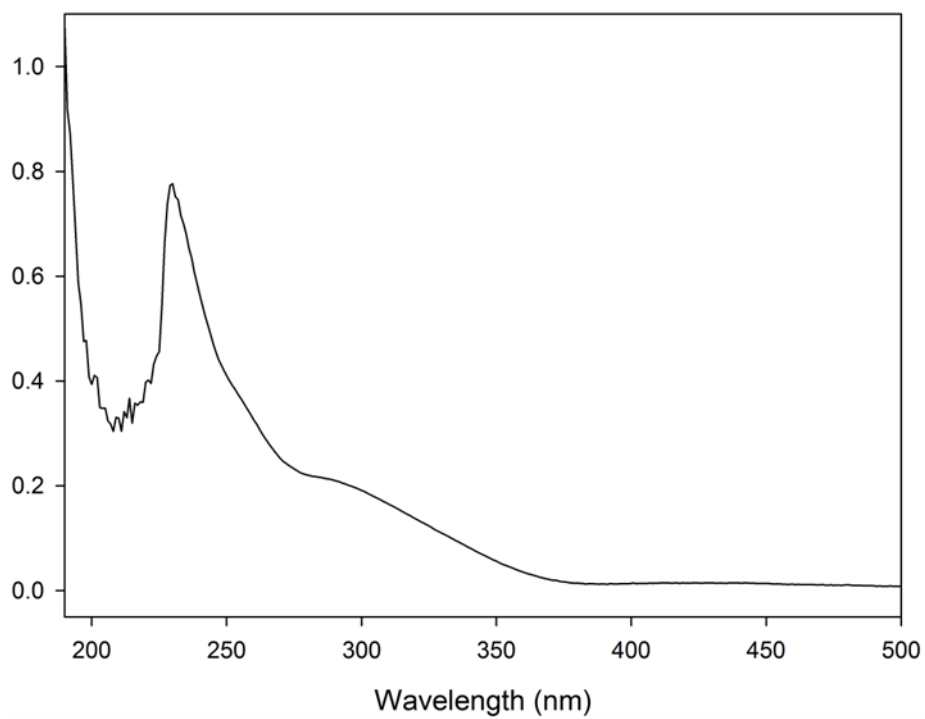

**Figure S7.** The UV spectrum of complex **2** in CH<sub>2</sub>Cl<sub>2</sub> solution.

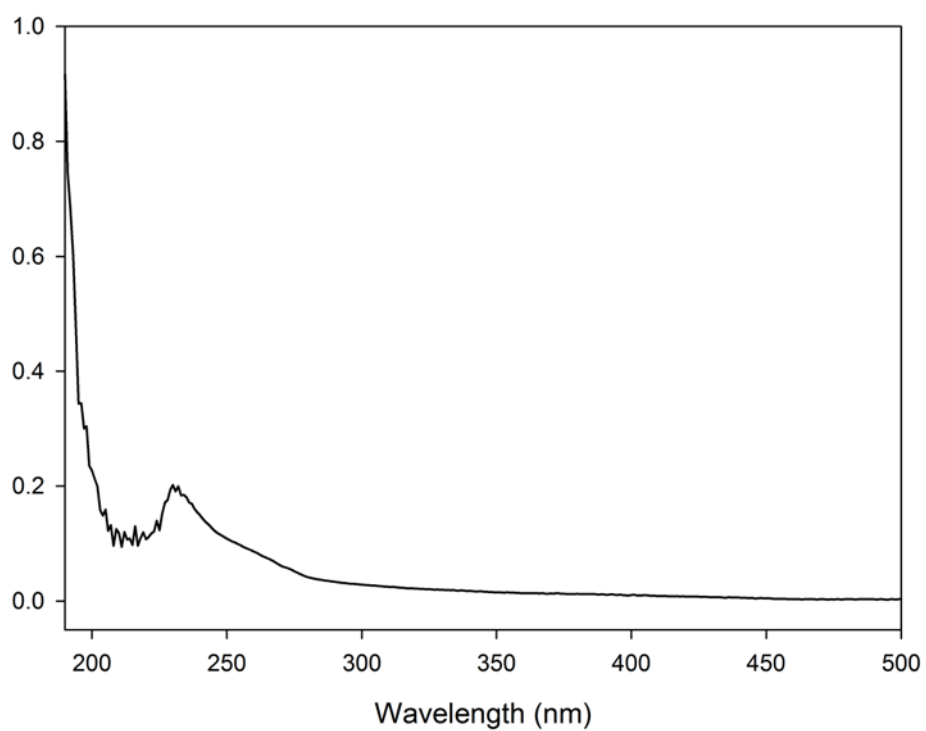

**Figure S6.** The UV spectrum of complex **3** in CH<sub>2</sub>Cl<sub>2</sub> solution.

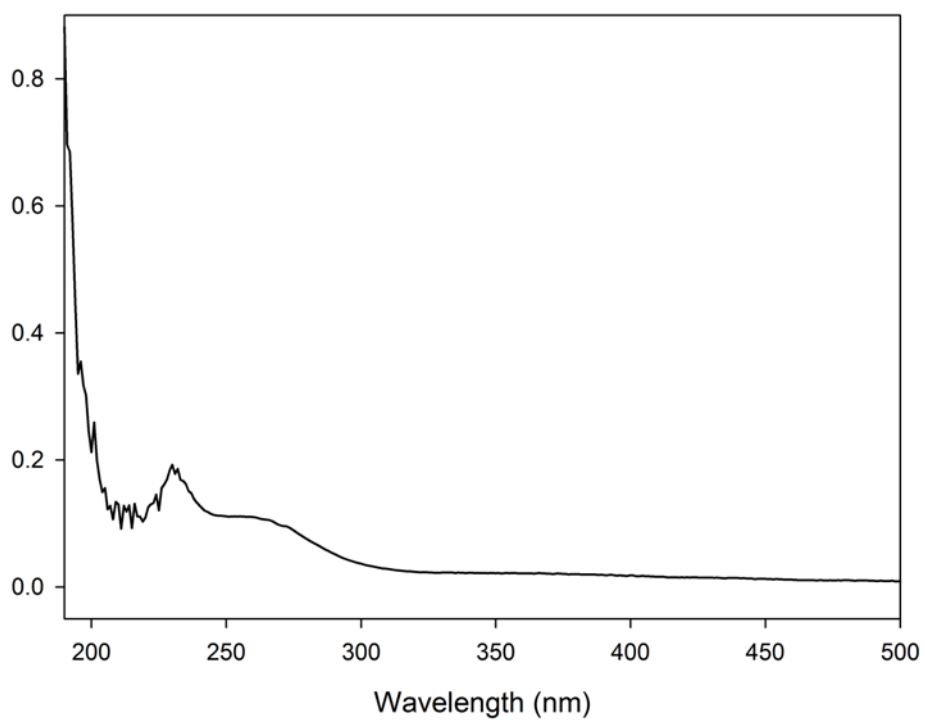

**Figure S7.** The UV spectrum of complex **4** in CH<sub>2</sub>Cl<sub>2</sub> solution.

## NO trapping experiments

**Reaction of  $\{\text{Co}(\text{NO})\}^{10}$  complexes **1** and **2** with  $[\text{Fe}(\text{TPP})\text{Cl}]$ .** In a Schlenk flask, a 10 mL  $\text{CH}_2\text{Cl}_2$  solution of the complex (2.5 mM, 0.011 g/100 ml for complex **1** or 0.016 g/100 ml for complex **2**) was conveyed via a cannula to another Schlenk flask containing a 10 mL  $\text{CH}_2\text{Cl}_2$  solution of  $[\text{Fe}(\text{TPP})\text{Cl}]$  (5,10,15,20-Tetraphenyl-21H,23H-porphine iron(III) chloride) (2.5 mM, 0.0177 g/100 ml). This mixture was stirred at  $0^\circ\text{C}$ . Throughout the reaction, IR spectroscopy was utilized for monitoring. However, no observable changes in the spectra were detected over time. Following this, the reaction temperature was raised to room temperature, and the reaction was allowed to continue for 6 hours. IR analysis confirmed that no reaction occurred.

**Reaction of  $\{\text{Co}(\text{NO})_2\}^{10}$  complex **3-5** with  $[\text{Fe}(\text{TPP})\text{Cl}]$ .** In the reaction of  $\{\text{Co}(\text{NO})_2\}^{10}$  complexes **3-5** with  $[\text{Fe}(\text{TPP})\text{Cl}]$ , a 10 mL  $\text{CH}_2\text{Cl}_2$  solution of the complex (2.5 mM, 0.018 g/100 ml for complex **3**, 0.012 g/100 ml for complex **4**, and 0.017 g/100 ml for complex **5**) was transferred from a Schlenk flask via a cannula into another Schlenk flask. This flask contained a 10 mL  $\text{CH}_2\text{Cl}_2$  solution of  $[\text{Fe}(\text{TPP})\text{Cl}]$  (5,10,15,20-Tetraphenyl-21H,23H-porphine iron(III) chloride) at a concentration of 5.0 mM (0.036 g/100 ml). This mixture was then stirred at  $0^\circ\text{C}$  for 3 hours. IR analysis confirmed that no reaction occurred for complex **3**. The reaction of complex **4** was monitored over time, with **Figure S8** showing an overlay IR spectrum of the reaction at 3 hours (red line) and 6 hours (black line). Approximately 50% of complex **4** remained, indicating that the NOs transfer reaction was not fully completed. In the case of complex **5**, **Figure S9** presents an overlay of the IR spectrum of the reaction at 3 hours (red line) and 6 hours (black line). The shift of the NO bands to  $1672\text{ cm}^{-1}$  indicates that the formation of  $[\text{Fe}(\text{TPP})\text{Cl}]$  is complete. A byproduct, diphenyl disulfide, was isolated using short column chromatography (with silica gel and diethyl ether as the eluent) and characterized by  $^1\text{H}$  NMR spectroscopy. A dark-black, insoluble solid was observed adhering to the top of the short column during the chromatography process.

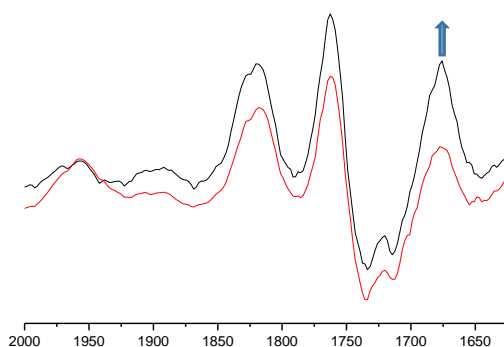

**Figure S8.** An overlaid IR spectrum from the reaction between complex **4** and  $[\text{Fe}(\text{TPP})\text{Cl}]$ , showing spectral data at both 3 hours (red line) and 6 hours (black line).

The appearance of [Fe(TPP)NO] is indicated by a blue arrow.

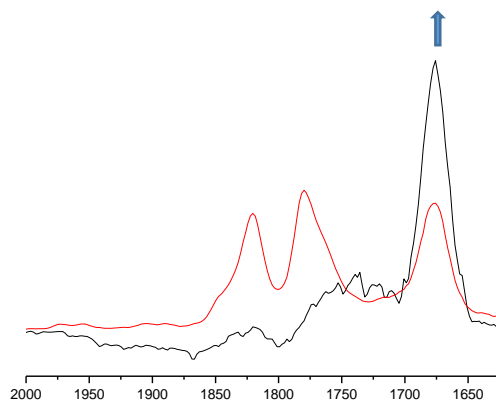

**Figure S9.** An overlaid IR spectrum from the reaction between complex **5** and [Fe(TPP)Cl], showing spectral data at both 3 hours (red line) and 6 hours (black line). The appearance of [Fe(TPP)NO] is indicated by a blue arrow.

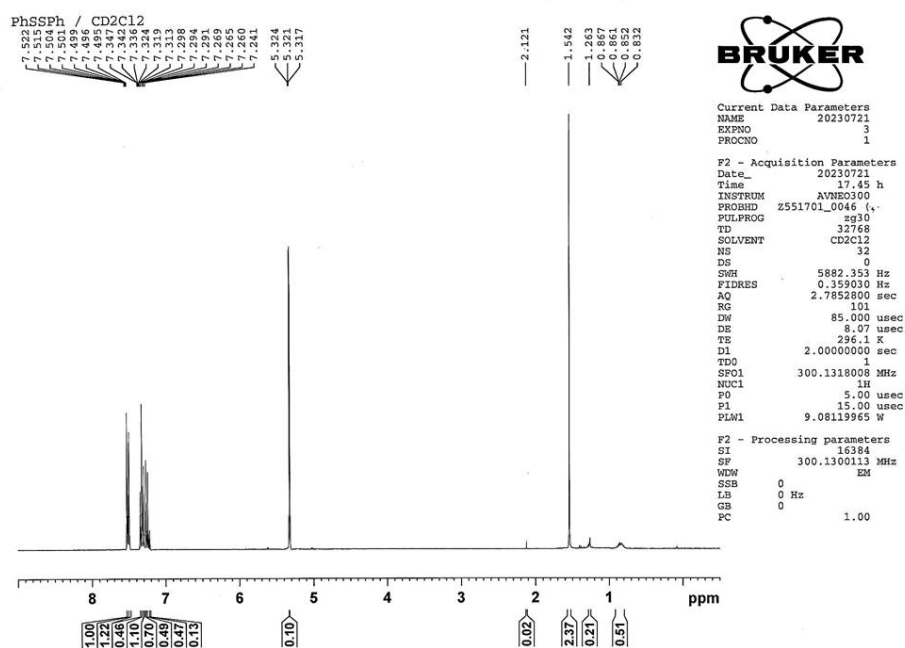

**Figure S10.** The  $^1\text{H}$  NMR of isolated diphenyl disulfide in  $\text{CD}_2\text{Cl}_2$
